# Supplementary material for: Proteomic Approaches Identify Members of Cofilin Pathway Involved in Oral Tumorigenesis
Source: PubMed Central journal article supplement (PMC3515627; doi:10.1371/journal.pone.0050517), 2012-12-05
Supplement: pone.0050517.s006.pdf [file pone.0050517.s006.pdf]

**Supporting Table 3. List of 248 proteins identified in "more-aggressive" (MA), "less-aggressive" (LA) tumors and surgical margins (SM) by 1-DE, MS and Scaffold software according to quantitative value. Proteins with a fold change of at least 1.5 were considered with differential abundance between the categories.**

| Gene symbol | Protein name                                        | Accession Number   | Quantitative value |       |        | Fold change |       |       |
|-------------|-----------------------------------------------------|--------------------|--------------------|-------|--------|-------------|-------|-------|
|             |                                                     |                    | SM                 | LA    | MA     | MA/SM       | LA/SM | MA/LA |
| A2M         | Alpha-2-macroglobulin                               | gi 112911 (+5)     | 2.63               | 0     | 1      | 0.4         | <1.5  |       |
| ACTB        | Actin, cytoplasmic 1                                | gi 14250401 (+8)   | 22.33              | 19.38 | 30.43  | 1.4         | 0.9   | 1.6   |
| ACTC1       | Actin, alpha cardiac muscle 1                       | gi 158254664 (+2)  | 23.64              | 17.69 | 21.87  | 0.9         | 0.7   | 1.2   |
| ACTN1       | Alpha-actinin-1                                     | gi 194097350 (+6)  | 1                  | 3.37  | 10.46  | 10.5        | 3.4   | 3.1   |
| AHNAK       | Neuroblast differentiation-associated protein AHNAK | gi 61743954        | 1                  | 10.11 | 8.56   | 8.6         | 10.1  | 0.8   |
| ALB         | Serum albumin                                       | gi 122920512 (+6)  | 288.95             | 190.4 | 173.06 | 0.6         | 0.7   | 0.9   |
| ALDH3A1     | Aldehyde dehydrogenase, dimeric NADP-preferring     | gi 178375 (+3)     | 1                  | 0.84  | 0      | -           | 0.8   | -     |
| ALDOA       | Fructose-bisphosphate aldolase A                    | gi 119600342 (+6)  | 1.31               | 0.84  | 0.95   | 0.7         | 0.6   | 1.1   |
| ANP32A      | ANP32A protein                                      | gi 115528927 (+4)  | 1                  | 1.68  | 1.9    | 1.9         | 1.7   | 1.1   |
| ANXA1       | Annexin A1                                          | gi 119582950 (+2)  | 18.39              | 20.22 | 9.51   | 0.5         | 1.1   | 0.5   |
| ANXA2       | Annexin A2                                          | gi 16306978 (+5)   | 14.45              | 17.69 | 25.67  | 1.8         | 1.2   | 1.5   |
| ANXA4       | Annexin A4                                          | gi 1703319 (+5)    | 1                  | 1.68  | 0.95   | 1.0         | 1.7   | 0.6   |
| ANXA5       | Annexin A5                                          | gi 157831404 (+3)  | 2.63               | 13.48 | 7.61   | 2.9         | 5.1   | 0.6   |
| APCS        | Serum amyloid P-component                           | gi 337758 (+2)     | 6.57               | 0.84  | 0.95   | 0.1         | 0.1   | 1.1   |
| APOA1       | Apolipoprotein A-I                                  | gi 90108664        | 13.13              | 7.58  | 7.61   | 0.6         | 0.6   | 1.0   |
| ARPC2       | Actin-related protein 2/3 complex subunit 2         | gi 5031599         | 1                  | 1.68  | 0.95   | 1.0         | 1.7   | 0.6   |
| ASPN        | Asporin                                             | gi 13625797 (+3)   | 1.31               | 1.68  | 2.85   | 2.2         | 1.3   | 1.7   |
| ATP1B3      | Sodium/potassium transporting ATPase subunit beta-3 | gi 4502281         | 1                  | 0     | 1.9    | 1.9         |       | >1.5  |
| ATP5B       | ATP synthase subunit beta, mitochondrial            | gi 32189394 (+1)   | 2.63               | 6.74  | 13.31  | 5.1         | 2.6   | 2.0   |
| BGN         | Biglycan                                            | gi 119593267 (+9)  | 1.31               | 8.42  | 6.66   | 5.1         | 6.4   | 0.8   |
| C4B         | Complement C4-B                                     | gi 1314244 (+19)   | 2.63               | 1     | 1      | 0.4         | 0.4   | 1.0   |
| CALM1       | Calmodulin                                          | gi 16974825        | 1.31               | 0.84  | 2.85   | 2.2         | 0.6   | 3.4   |
| CALML5      | Calmodulin-like protein 5                           | gi 21465435 (+1)   | 1                  | 0.84  | 1.9    | 1.9         | 0.8   | 2.3   |
| CAP1        | Adenylyl cyclase-associated protein 1               | gi 116241280 (+12) | 1                  | 1     | 1.9    | 1.9         | 1.0   | 1.9   |
| CAPZA1      | F-actin-capping protein subunit alpha-1             | gi 158260331 (+1)  | 1.31               | 1.68  | 2.85   | 2.2         | 1.3   | 1.7   |
| CFL1        | Cofilin-1                                           | gi 119594857 (+3)  | 1.31               | 1.68  | 1.9    | 1.5         | 1.3   | 1.1   |
| CKM         | Creatine kinase M-type or M-CK                      | gi 119577741 (+3)  | 11.82              | 5.05  | 1      | 0.1         | 0.4   | 0.2   |
| CLIC1       | Chloride intracellular channel protein 1            | gi 14251209 (+5)   | 1                  | 1.68  | 0.95   | 1.0         | 1.7   | 0.6   |
| CLU         | Clusterin                                           | gi 178855 (+7)     | 1.31               | 1.68  | 0.95   | 0.7         | 1.3   | 0.6   |
| COL12A1     | Collagen alpha-1(XII) chain                         | gi 119569133 (+4)  | 1                  | 1.68  | 1      | 1.0         | 1.7   | 0.6   |
| COL1A1      | Collagen alpha-1(I) chain                           | gi 110349772 (+6)  | 1.31               | 3.37  | 2.85   | 2.2         | 2.6   | 0.8   |
| COL1A2      | Collagen alpha-2(I) chain                           | gi 119597201 (+7)  | 0                  | 4.21  | 4.75   | >1.5        | >1.5  | 1.1   |
| COL6A1      | Collagen alpha-1(VI) chain                          | gi 87196339        | 7.88               | 2.53  | 4.75   | 0.6         | 0.3   | 1.9   |
| COL6A3      | Collagen alpha-3(VI) chain                          | gi 119591511 (+9)  | 14.45              | 13.48 | 15.21  | 1.1         | 0.9   | 1.1   |
| CPA3        | Mast cell carboxypeptidase A                        | gi 115887 (+3)     | 1.31               | 1     | 1      | 0.8         | 0.8   | 1.0   |
| CRYAB       | Alpha-crystallin B chain                            | gi 227018373 (+1)  | 2.63               | 0     | 1.9    | 0.7         | <1.5  | >1.5  |
| CSTA        | Cystatin-A                                          | gi 15988456 (+1)   | 1                  | 3.37  | 1      | 1.0         | 3.4   | 0.3   |
| CTSD        | Cathepsin D                                         | gi 157879202 (+1)  | 1.31               | 5.05  | 5.71   | 4.4         | 3.9   | 1.1   |
| CTSG        | Cathepsin G                                         | gi 20664221 (+2)   | 1                  | 1.68  | 0.95   | 1.0         | 1.7   | 0.6   |
| CYB5R3      | NADH-cytochrome b5 reductase 3                      | gi 119593674 (+9)  | 1                  | 1     | 1.9    | 1.9         | 1.0   | 1.9   |
| DCN         | Decorin                                             | gi 119617856 (+2)  | 3.94               | 4.21  | 2.85   | 0.7         | 1.1   | 0.7   |

|           |                                                          |                    |       |       |       |      |      |      |     |
|-----------|----------------------------------------------------------|--------------------|-------|-------|-------|------|------|------|-----|
| DEFA1     | Neutrophil defensin 1                                    | gi 228797 (+4)     | 0     | 1.68  | 1     |      |      | >1.5 | 0.6 |
| DES       | Desmin                                                   | gi 11907570 (+15)  | 1     | 5.9   | 9.51  | 9.5  | 5.9  | 5.9  | 1.6 |
| DPT       | Dermatopontin                                            | gi 21708099 (+2)   | 1.31  | 0.84  | 0.95  | 0.7  | 0.6  | 0.6  | 1.1 |
| DSP       | Desmoplakin                                              | gi 1147813 (+1)    | 1     | 4.21  | 1.9   | 1.9  | 4.2  | 0.5  |     |
| EEF1A1    | Elongation factor 1-alpha 1                              | gi 31092 (+6)      | 7.88  | 17.69 | 10.46 | 1.3  | 2.2  | 0.6  |     |
| EEF1D     | Elongation factor 1-delta                                | gi 10436857 (+10)  | 1     | 3.37  | 2.85  | 2.9  | 3.4  | 0.8  |     |
| ENO1      | Alpha-enolase                                            | gi 203282367 (+5)  | 1.31  | 9.27  | 16.16 | 12.3 | 7.1  | 1.7  |     |
| FGA       | Fibrinogen alpha chain                                   | gi 11761629 (+6)   | 5.25  | 4.21  | 1     | 0.2  | 0.8  | 0.2  |     |
| FHL1      | Four and a half LIM domains protein 1                    | gi 1381814 (+11)   | 2.63  | 1     | 1     | 0.4  | 0.4  | 1.0  |     |
| FN1       | Fibronectin                                              | gi 119590941 (+17) | 1     | 13.48 | 5.71  | 5.7  | 13.5 | 0.4  |     |
| GAPDH     | Glyceraldehyde-3-phosphate dehydrogenase                 | gi 31645           | 17.07 | 19.38 | 32.33 | 1.9  | 1.1  | 1.7  |     |
| GNB2L1    | Guanine nucleotide-binding protein subunit beta-2-like 1 | gi 119574078 (+9)  | 0     | 2.53  | 0.95  |      | >1.5 | 0.4  |     |
| GPI       | Glucose-6-phosphate isomerase or GPI                     | gi 14488680 (+6)   | 1     | 1     | 1.9   | 1.9  | 1.0  | 1.9  |     |
| GSTP1     | Glutathione S-transferase P or GSTP1-1                   | gi 11514451 (+15)  | 1     | 2.53  | 1.9   | 1.9  | 2.5  | 0.8  |     |
| H1FO      | Histone H1.0                                             | gi 194387670 (+1)  | 1.31  | 1.68  | 2.85  | 2.2  | 1.3  | 1.7  |     |
| H1FX      | Histone H1x                                              | gi 5174449         | 1     | 1.68  | 2.85  | 2.9  | 1.7  | 1.7  |     |
| HBA1/HBA2 | Hemoglobin subunit alpha                                 | gi 157883730 (+3)  | 18.39 | 9.27  | 3.8   | 0.2  | 0.5  | 0.4  |     |
| HBD       | Hemoglobin subunit delta                                 | gi 4504351 (+2)    | 38.09 | 24.43 | 1     | 0.0  | 0.6  | 0.0  |     |
| HIST1H1B  | Histone H1.5                                             | gi 4885381         | 2.63  | 5.9   | 9.51  | 3.6  | 2.2  | 1.6  |     |
| HIST1H1C  | Histone H1.2                                             | gi 4885375         | 13.13 | 11.79 | 21.87 | 1.7  | 0.9  | 1.9  |     |
| HIST1H2AJ | Histone H2A type 1-J                                     | gi 10800144 (+6)   | 23.64 | 26.12 | 33.28 | 1.4  | 1.1  | 1.3  |     |
| HIST1H2B  | Histone H2B type 1                                       | gi 10800138 (+14)  | 19.7  | 27.8  | 31.38 | 1.6  | 1.4  | 1.1  |     |
| HIST1H2BB | Histone H2B type 1-B                                     | gi 10800140 (+7)   | 19.7  | 24.43 | 33.28 | 1.7  | 1.2  | 1.4  |     |
| HIST1H3   | Histone H3.1                                             | gi 1568559 (+8)    | 3.94  | 5.9   | 4.75  | 1.2  | 1.5  | 0.8  |     |
| HIST1H4   | Histone H4                                               | gi 119575932 (+5)  | 6.57  | 10.95 | 16.16 | 2.5  | 1.7  | 1.5  |     |
| HMGB1     | High mobility group protein B1                           | gi 114649280 (+12) | 1     | 2.53  | 0     | -    | 2.5  | <1.5 |     |
| HNRNPA2B1 | Heterogeneous nuclear ribonucleoproteins A2/B1           | gi 14043072 (+2)   | 2.63  | 10.11 | 5.71  | 2.2  | 3.8  | 0.6  |     |
| HNRNPC    | Heterogeneous nuclear ribonucleoproteins C1/C2           | gi 109082737 (+12) | 2.63  | 6.74  | 7.61  | 2.9  | 2.6  | 1.1  |     |
| HNRNPK    | Heterogeneous nuclear ribonucleoprotein K                | gi 114625192 (+11) | 1     | 4.21  | 4.75  | 4.8  | 4.2  | 1.1  |     |
| HNRNPU    | Heterogeneous nuclear ribonucleoprotein U                | gi 14141161 (+12)  | 1     | 0.84  | 1     | 1.0  | 0.8  | 1.2  |     |
| HNRPA1    | Heterogeneous nuclear ribonucleoprotein A1               | gi 119617173 (+5)  | 0     | 2.53  | 1.9   | >1.5 | >1.5 | 0.8  |     |
| HP        | Haptoglobin                                              | gi 119579598 (+1)  | 10.51 | 8.42  | 2.85  | 0.3  | 0.8  | 0.3  |     |
| HPX       | Hemopexin                                                | gi 11321561 (+4)   | 1.31  | 1     | 1     | 0.8  | 0.8  | 1.0  |     |
| HSP90AA1  | Heat shock protein HSP 90-alpha                          | gi 153792590 (+4)  | 1     | 1     | 8.56  | 8.6  | 1.0  | 8.6  |     |
| HSP90AB1  | HSP90AB1 protein                                         | gi 194386896 (+3)  | 2.63  | 9.27  | 9.51  | 3.6  | 3.5  | 1.0  |     |
| HSP90B1   | Endoplasmic                                              | gi 15010550 (+2)   | 1     | 2.53  | 3.8   | 3.8  | 2.5  | 1.5  |     |
| HSPA8     | Heat shock cognate 71 kDa protein                        | gi 193788318 (+6)  | 1     | 1.68  | 1.9   | 1.9  | 1.7  | 1.1  |     |
| HSPB1     | Heat shock protein beta-1 or HSP 27                      | gi 4504517 (+1)    | 5.25  | 10.95 | 10.46 | 2.0  | 2.1  | 1.0  |     |
| HSPD1     | 60 kDa heat shock protein, mitochondrial or HSP-60       | gi 189502784 (+5)  | 1     | 2.53  | 4.75  | 4.8  | 2.5  | 1.9  |     |
| HYOU1     | HYOU1 protein                                            | gi 116283339 (+6)  | 1     | 1.68  | 0     | -    | 1.7  | <1.5 |     |
| IGHA1     | Ig alpha-1 chain C region                                | gi 113584 (+31)    | 1.31  | 4.21  | 1     | 0.8  | 3.2  | 0.2  |     |
| IGHG3     | Ig gamma-3 chain C region                                | gi 10334541 (+2)   | 15.76 | 12.64 | 1     | 0.1  | 0.8  | 0.1  |     |
| IGLC7     | Ig lambda-7 chain C region                               | gi 1335160 (+6)    | 6.57  | 10.95 | 1     | 0.2  | 1.7  | 0.1  |     |
| KRT1      | Keratin, type II cytoskeletal 1                          | gi 11935049 (+1)   | 11.82 | 11.79 | 5.71  | 0.5  | 1.0  | 0.5  |     |
| KRT10     | Keratin, type I cytoskeletal 10                          | gi 119581085 (+4)  | 2.63  | 5.05  | 7.61  | 2.9  | 1.9  | 1.5  |     |
| KRT13     | Keratin, type I cytoskeletal 13                          | gi 131412225       | 36.78 | 32.01 | 36.13 | 1.0  | 0.9  | 1.1  |     |

|        |                                                                               |                    |       |       |       |      |      |      |
|--------|-------------------------------------------------------------------------------|--------------------|-------|-------|-------|------|------|------|
| KRT14  | Keratin, type I cytoskeletal 14                                               | gi 12803709 (+2)   | 14.45 | 53.08 | 67.51 | 4.7  | 3.7  | 1.3  |
| KRT16  | Keratin, type I cytoskeletal 16                                               | gi 1195531 (+1)    | 1     | 35.38 | 45.64 | 45.6 | 35.4 | 1.3  |
| KRT17  | Keratin, type I cytoskeletal 17                                               | gi 21754583 (+1)   | 1     | 16.01 | 39.94 | 39.9 | 16.0 | 2.5  |
| KRT19  | Keratin, type I cytoskeletal 19                                               | gi 24234699 (+2)   | 11.82 | 21.06 | 30.43 | 2.6  | 1.8  | 1.4  |
| KRT4   | Keratin, type II cytoskeletal 4                                               | gi 109255249 (+5)  | 32.84 | 5.9   | 6.66  | 0.2  | 0.2  | 1.1  |
| KRT5   | Keratin, type II cytoskeletal 5                                               | gi 119395754 (+1)  | 34.15 | 80.88 | 67.51 | 2.0  | 2.4  | 0.8  |
| KRT6A  | Keratin, type II cytoskeletal 6A                                              | gi 114644568 (+4)  | 36.78 | 76.67 | 70.36 | 1.9  | 2.1  | 0.9  |
| KRT8   | Keratin, type II cytoskeletal 8                                               | gi 119617057 (+5)  | 1     | 3.37  | 11.41 | 11.4 | 3.4  | 3.4  |
| KRT9   | Keratin, type I cytoskeletal 9                                                | gi 435476 (+1)     | 1.31  | 3.37  | 1     | 0.8  | 2.6  | 0.3  |
| LAMP2  | Lysosomal-associated membrane protein 2C                                      | gi 169790833 (+5)  | 1     | 1     | 0.95  | 1.0  | 1.0  | 1.0  |
| LCN2   | Neutrophil gelatinase-associated lipocalin                                    | gi 119608154 (+17) | 1     | 1.68  | 1     | 1.0  | 1.7  | 0.6  |
| LDB3   | LIM domain-binding protein 3                                                  | gi 119600728 (+7)  | 2.63  | 1     | 1     | 0.4  | 0.4  | 1.0  |
| LGALS1 | Galectin-1                                                                    | gi 42542977 (+2)   | 1     | 5.05  | 6.66  | 6.7  | 5.1  | 1.3  |
| LGALS7 | Galectin-7                                                                    | gi 34783544 (+2)   | 1.31  | 2.53  | 0.95  | 0.7  | 1.9  | 0.4  |
| LMNA   | Prelamin-A/C                                                                  | gi 119573381 (+13) | 1     | 4.21  | 3.8   | 3.8  | 4.2  | 0.9  |
| LUM    | Lumican                                                                       | gi 4505047 (+1)    | 10.51 | 22.75 | 17.12 | 1.6  | 2.2  | 0.8  |
| MANF   | Mesencephalic astrocyte-derived neurotrophic factor                           | gi 119585542 (+5)  | 1     | 0.84  | 1.9   | 1.9  | 0.8  | 2.3  |
| MB     | Myoglobin                                                                     | gi 119580469 (+6)  | 6.57  | 0     | 2.85  | 0.4  | <1.5 | >1.5 |
| MDH2   | Malate dehydrogenase, mitochondrial                                           | gi 21735621 (+5)   | 2.63  | 3.37  | 0     | <1.5 | 1.3  | <1.5 |
| MYH2   | Myosin-2                                                                      | gi 153791586 (+1)  | 39.4  | 0.84  | 7.61  | 0.2  | 0.0  | 9.1  |
| MYH7   | Myosin-7                                                                      | gi 115496169 (+4)  | 22.33 | 1     | 11.41 | 0.5  | 0.0  | 11.4 |
| MYH9   | Myosin-9                                                                      | gi 12667788        | 1.31  | 5.05  | 14.26 | 10.9 | 3.9  | 2.8  |
| MYL1   | Myosin light chain 1/3, skeletal muscle isoform or MLC1/MLC3                  | gi 119590891 (+4)  | 6.57  | 1     | 0.95  | 0.1  | 0.2  | 1.0  |
| MYL12B | Myosin regulatory light chain 12B                                             | gi 15809016 (+3)   | 2.63  | 7.58  | 6.66  | 2.5  | 2.9  | 0.9  |
| MYL2   | Myosin regulatory light chain 2, ventricular/cardiac muscle isoform or MLC-2v | gi 119618350 (+3)  | 3.94  | 1     | 0.95  | 0.2  | 0.3  | 1.0  |
| MYL6   | Myosin light polypeptide 6                                                    | gi 113812151 (+5)  | 1.31  | 4.21  | 3.8   | 2.9  | 3.2  | 0.9  |
| MYLPF  | Myosin regulatory light chain 2, skeletal muscle isoform or MLC2B             | gi 1220346 (+2)    | 7.88  | 1     | 1.9   | 0.2  | 0.1  | 1.9  |
| MYOZ1  | Myozenin-1                                                                    | gi 10864053 (+1)   | 3.94  | 1     | 1     | 0.3  | 0.3  | 1.0  |
| NACA   | Nascent polypeptide-associated complex subunit alpha                          | gi 163965366 (+3)  | 1.31  | 3.37  | 2.85  | 2.2  | 2.6  | 0.8  |
| NME2   | Nucleoside diphosphate kinase B                                               | gi 66392203 (+1)   | 1     | 2.53  | 0.95  | 1.0  | 2.5  | 0.4  |
| NPM1   | Nucleophosmin                                                                 | gi 10835063 (+8)   | 1.31  | 0.84  | 2.85  | 2.2  | 0.6  | 3.4  |
| NRP1   | Neuropilin-1                                                                  | gi 160877748       | 15.76 | 14.32 | 1     | 0.1  | 0.9  | 0.1  |
| OGN    | Mimectan                                                                      | gi 194380046 (+2)  | 6.57  | 1.68  | 2.85  | 0.4  | 0.3  | 1.7  |
| ORM1   | Alpha-1-acid glycoprotein 1                                                   | gi 112877 (+3)     | 2.63  | 0.84  | 0.95  | 0.4  | 0.3  | 1.1  |
| P4HB   | Protein disulfide-isomerase                                                   | gi 194388618 (+2)  | 1     | 3.37  | 2.85  | 2.9  | 3.4  | 0.8  |
| PACAP  | Plasma cell-induced resident endoplasmic reticulum protein                    | gi 117938314       | 1     | 1.68  | 0.95  | 1.0  | 1.7  | 0.6  |
| PDIA3  | Protein disulfide-isomerase A3                                                | gi 114656687 (+8)  | 1     | 0.84  | 1.9   | 1.9  | 0.8  | 2.3  |
| PDIA6  | Protein disulfide-isomerase A6                                                | gi 1710248 (+5)    | 1     | 4.21  | 8.56  | 8.6  | 4.2  | 2.0  |
| PEBP1  | Phosphatidylethanolamine-binding protein 1                                    | gi 194387966 (+2)  | 1.31  | 1.68  | 2.85  | 2.2  | 1.3  | 1.7  |
| PFDN2  | Prefoldin subunit 2                                                           | gi 12408675        | 1     | 0.84  | 1.9   | 1.9  | 0.8  | 2.3  |
| PFN1   | Profilin-1                                                                    | gi 157833469 (+3)  | 1     | 2.53  | 2.85  | 2.9  | 2.5  | 1.1  |
| PHB2   | Prohibitin-2                                                                  | gi 119609105 (+4)  | 1     | 0     | 1.9   | 1.9  |      | >1.5 |
| POSTN  | Periostin                                                                     | gi 166343765 (+13) | 1     | 6.74  | 14.26 | 14.3 | 6.7  | 2.1  |
| PPIA   | Peptidyl-prolyl cis-trans isomerase A or PPIase A or Cyclophilin A            | gi 10863927 (+3)   | 2.63  | 10.11 | 9.51  | 3.6  | 3.8  | 0.9  |
| PPIB   | Peptidyl-prolyl cis-trans isomerase B                                         | gi 1310882 (+4)    | 2.63  | 8.42  | 11.41 | 4.3  | 3.2  | 1.4  |
| PRDX1  | Peroxiredoxin-1                                                               | gi 119627382 (+3)  | 7.88  | 5.9   | 4.75  | 0.6  | 0.7  | 0.8  |

|        |                                        |                    |      |       |       |      |      |     |
|--------|----------------------------------------|--------------------|------|-------|-------|------|------|-----|
| PRDX2  | Peroxiredoxin-2                        | gi 194375974 (+2)  | 7.88 | 5.05  | 0.95  | 0.1  | 0.6  | 0.2 |
| PRKCSH | Glucosidase 2 subunit beta             | gi 119604622 (+6)  | 1    | 1     | 2.85  | 2.9  | 1.0  | 2.9 |
| PSAP   | Proactivator polypeptide               | gi 110224476 (+16) | 1    | 0.84  | 1.9   | 1.9  | 0.8  | 2.3 |
| PSMA1  | Proteasome subunit alpha type-1        | gi 119588883 (+4)  | 1    | 0.84  | 0.95  | 1.0  | 0.8  | 1.1 |
| PSME1  | Proteasome activator complex subunit 1 | gi 119586510 (+3)  | 1    | 0.84  | 1.9   | 1.9  | 0.8  | 2.3 |
| RAP1A  | Ras-related protein Rap-1A             | gi 14595132        | 1    | 1.68  | 1.9   | 1.9  | 1.7  | 1.1 |
| RPL11  | 60S ribosomal protein L11              | gi 13385408 (+4)   | 1.31 | 2.53  | 1.9   | 1.5  | 1.9  | 0.8 |
| RPL12  | 60S ribosomal protein L12              | gi 119608073 (+3)  | 0    | 2.53  | 1.9   | >1.5 | >1.5 | 0.8 |
| RPL13  | 60S ribosomal protein L13              | gi 15431295 (+2)   | 1    | 1.68  | 1.9   | 1.9  | 1.7  | 1.1 |
| RPL18  | 60S ribosomal protein L18              | gi 119572744 (+4)  | 1    | 3.37  | 2.85  | 2.9  | 3.4  | 0.8 |
| RPL19  | 60S ribosomal protein L19              | gi 119580972 (+5)  | 1    | 0.84  | 1.9   | 1.9  | 0.8  | 2.3 |
| RPL22  | 60S ribosomal protein L22              | gi 108996192 (+4)  | 1.31 | 3.37  | 0.95  | 0.7  | 2.6  | 0.3 |
| RPL23  | 60S ribosomal protein L23              | gi 13097600 (+2)   | 1    | 0.84  | 1     | 1.0  | 0.8  | 1.2 |
| RPL23A | 60S ribosomal protein L23a             | gi 119571516 (+5)  | 1.31 | 3.37  | 5.71  | 4.4  | 2.6  | 1.7 |
| RPL24  | 60S ribosomal protein L24              | gi 119600188 (+3)  | 1.31 | 2.53  | 2.85  | 2.2  | 1.9  | 1.1 |
| RPL26  | 60S ribosomal protein L26              | gi 292435 (+2)     | 0    | 2.53  | 3.8   | >1.5 | >1.5 | 1.5 |
| RPL27  | 60S ribosomal protein L27              | gi 119581314 (+2)  | 1    | 0.84  | 0.95  | 1.0  | 0.8  | 1.1 |
| RPL28  | 60S ribosomal protein L28              | gi 13904866 (+4)   | 1    | 2.53  | 2.85  | 2.9  | 2.5  | 1.1 |
| RPL31  | 60S ribosomal protein L31              | gi 148746199 (+6)  | 1.31 | 2.53  | 2.85  | 2.2  | 1.9  | 1.1 |
| RPL34  | 60S ribosomal protein L34              | gi 1008856 (+1)    | 1    | 0     | 0.95  | 1.0  |      |     |
| RPL4   | 60S ribosomal protein L4               | gi 119598179 (+5)  | 1    | 0.84  | 0.95  | 1.0  | 0.8  | 1.1 |
| RPL5   | 60S ribosomal protein L5               | gi 187609312 (+5)  | 1    | 1.68  | 0.95  | 1.0  | 1.7  | 0.6 |
| RPL6   | 60S ribosomal protein L6               | gi 16753227 (+5)   | 1    | 4.21  | 3.8   | 3.8  | 4.2  | 0.9 |
| RPL8   | 60S ribosomal protein L8               | gi 119602459 (+2)  | 1    | 1.68  | 1.9   | 1.9  | 1.7  | 1.1 |
| RPLP0  | 60S acidic ribosomal protein P0        | gi 119618576 (+6)  | 1    | 3.37  | 5.71  | 5.7  | 3.4  | 1.7 |
| RPLP2  | 60S acidic ribosomal protein P2        | gi 4506671         | 1.31 | 5.05  | 5.71  | 4.4  | 3.9  | 1.1 |
| RPS10  | 40S ribosomal protein S10              | gi 119624187 (+3)  | 1    | 0.84  | 1.9   | 1.9  | 0.8  | 2.3 |
| RPS11  | 40S ribosomal protein S11              | gi 4506681         | 1    | 1.68  | 0.95  | 1.0  | 1.7  | 0.6 |
| RPS13  | 40S ribosomal protein S13              | gi 4506685         | 1    | 0.84  | 1.9   | 1.9  | 0.8  | 2.3 |
| RPS14  | 40S ribosomal protein S14              | gi 5032051         | 0    | 1.68  | 1.9   | >1.5 | >1.5 | 1.1 |
| RPS16  | 40S ribosomal protein S16              | gi 109124686 (+3)  | 1.31 | 3.37  | 1.9   | 1.5  | 2.6  | 0.6 |
| RPS18  | 40S ribosomal protein S18              | gi 114606879 (+1)  | 1    | 4.21  | 6.66  | 6.7  | 4.2  | 1.6 |
| RPS19  | 40S ribosomal protein S19              | gi 119577478 (+2)  | 0    | 3.37  | 6.66  | >1.5 | >1.5 | 2.0 |
| RPS23  | 40S ribosomal protein S23              | gi 4506701         | 1.31 | 1.68  | 0.95  | 0.7  | 1.3  | 0.6 |
| RPS4X  | 40S ribosomal protein S4, X isoform    | gi 119592221 (+5)  | 1.31 | 0.84  | 0.95  | 0.7  | 0.6  | 1.1 |
| RPS5   | 40S ribosomal protein S5               | gi 119592989 (+3)  | 1    | 0.84  | 0.95  | 1.0  | 0.8  | 1.1 |
| RPS6   | 40S ribosomal protein S6               | gi 109111443 (+7)  | 1.31 | 2.53  | 1.9   | 1.5  | 1.9  | 0.8 |
| RPS7   | 40S ribosomal protein S7               | gi 337518 (+1)     | 0    | 4.21  | 0.95  |      | >1.5 | 0.2 |
| RPS8   | 40S ribosomal protein S8               | gi 119627428 (+2)  | 1    | 2.53  | 2.85  | 2.9  | 2.5  | 1.1 |
| RPS9   | 40S ribosomal protein S9               | gi 14141193 (+1)   | 1    | 2.53  | 2.85  | 2.9  | 2.5  | 1.1 |
| RSU1   | Ras suppressor protein 1               | gi 34577083 (+2)   | 1    | 1.68  | 0.95  | 1.0  | 1.7  | 0.6 |
| S100A6 | Protein S100-A6 or calcyclin           | gi 7657532         | 2.63 | 1.68  | 0.95  | 0.4  | 0.6  | 0.6 |
| S100A7 | Protein S100-A7 or psoriasin           | gi 115298657 (+3)  | 1    | 2.53  | 0.95  | 1.0  | 2.5  | 0.4 |
| S100A8 | Protein S100-A8                        | gi 21614544 (+2)   | 6.57 | 6.74  | 6.66  | 1.0  | 1.0  | 1.0 |
| S100A9 | Protein S100-A9 or Calgranulin-B       | gi 189053201 (+3)  | 6.57 | 20.22 | 10.46 | 1.6  | 3.1  | 0.5 |
| SEPT2  | Septin-2                               | gi 1040689 (+12)   | 1    | 1     | 1.9   | 1.9  | 1.0  | 1.9 |

|          |                                                             |                    |       |       |       |      |      |      |
|----------|-------------------------------------------------------------|--------------------|-------|-------|-------|------|------|------|
| SERPINA1 | Alpha-1-antitrypsin                                         | gi 110350939 (+17) | 5.25  | 10.95 | 5.71  | 1.1  | 2.1  | 0.5  |
| SERPINC1 | Antithrombin-III                                            | gi 179161 (+3)     | 1     | 1.68  | 0     | -    | 1.7  | <1.5 |
| SERPINH1 | Serpin H1                                                   | gi 119595384 (+6)  | 1     | 0.84  | 2.85  | 2.9  | 0.8  | 3.4  |
| SET      | Protein SET                                                 | gi 119608226 (+9)  | 1     | 0.84  | 0.95  | 1.0  | 0.8  | 1.1  |
| SFN      | 14-3-3 protein sigma or stratifin                           | gi 16306737 (+2)   | 2.63  | 11.79 | 11.41 | 4.3  | 4.5  | 1.0  |
| SH3BGRL  | SH3 domain-binding glutamic acid-rich-like protein          | gi 12052955 (+3)   | 1     | 1     | 0.84  | 0.8  | 1.0  | 0.8  |
| SOD2     | Superoxide dismutase [Mn], mitochondrial                    | gi 110590806 (+26) | 1.31  | 2.53  | 1.9   | 1.5  | 1.9  | 0.8  |
| SPRR3    | Small proline-rich protein 3                                | gi 4885607 (+3)    | 1.31  | 0.84  | 1     | 0.8  | 0.6  | 1.2  |
| SRSF1    | Serine/arginine-rich splicing factor 1                      | gi 118582269 (+5)  | 1     | 2.53  | 0.95  | 1.0  | 2.5  | 0.4  |
| SRSF3    | Serine/arginine-rich splicing factor 3                      | gi 119624305 (+4)  | 1     | 1.68  | 2.85  | 2.9  | 1.7  | 1.7  |
| SSR1     | Translocon-associated protein subunit alpha                 | gi 109069546 (+8)  | 1     | 0.84  | 0     | -    | 0.8  | -    |
| STMN1    | Stathmin                                                    | gi 197692339 (+2)  | 1     | 0.84  | 2.85  | 2.9  | 0.8  | 3.4  |
| SUB1     | Activated RNA polymerase II transcriptional coactivator p15 | gi 16307067 (+3)   | 1     | 1.68  | 1.9   | 1.9  | 1.7  | 1.1  |
| TAGLN    | Transgelin                                                  | gi 119587704 (+3)  | 1     | 0.84  | 4.75  | 4.8  | 0.8  | 5.7  |
| TAGLN2   | Transgelin-2                                                | gi 12803567 (+3)   | 1     | 6.74  | 3.8   | 3.8  | 6.7  | 0.6  |
| TALDO1   | Transaldolase                                               | gi 48257056 (+1)   | 1     | 2.53  | 0.95  | 1.0  | 2.5  | 0.4  |
| TF       | Serotransferrin                                             | gi 110590599 (+4)  | 7.88  | 3.37  | 2.85  | 0.4  | 0.4  | 0.8  |
| THY1     | Thy-1 membrane glycoprotein                                 | gi 119587893 (+3)  | 1     | 2.53  | 0     | -    | 2.5  | <1.5 |
| TMED9    | Transmembrane emp24 domain-containing protein 9             | gi 119605373 (+4)  | 1     | 0     | 0.95  | 1.0  |      |      |
| TNC      | Tenascin                                                    | gi 119607840 (+5)  | 1     | 5.9   | 15.21 | 15.2 | 5.9  | 2.6  |
| TNNT3    | Troponin T, fast skeletal muscle                            | gi 112789538 (+5)  | 5.25  | 1     | 0.95  | 0.2  | 0.2  | 1.0  |
| TP11     | Triosephosphate isomerase 1 or TIM                          | gi 17389815 (+6)   | 1.31  | 2.53  | 5.71  | 4.4  | 1.9  | 2.3  |
| TPM1     | Tropomyosin alpha-1 chain                                   | gi 49660014 (+1)   | 14.45 | 8.42  | 9.51  | 0.7  | 0.6  | 1.1  |
| TPM2     | Tropomyosin beta chain                                      | gi 42476296        | 13.13 | 9.27  | 7.61  | 0.6  | 0.7  | 0.8  |
| TPM3     | Tropomyosin alpha-3 chain                                   | gi 114155140 (+1)  | 10.51 | 8.42  | 7.61  | 0.7  | 0.8  | 0.9  |
| TPM3     | Tropomyosin alpha-3 chain                                   | gi 197099510       | 10.51 | 9.27  | 8.56  | 0.8  | 0.9  | 0.9  |
| TPM3     | Tropomyosin alpha-3 chain                                   | gi 114155144       | 1     | 1     | 8.56  | 8.6  | 1.0  | 8.6  |
| TPM4     | Tropomyosin alpha-4 chain                                   | gi 4507651         | 1     | 10.95 | 7.61  | 7.6  | 11.0 | 0.7  |
| TUBA1C   | Tubulin alpha-1C chain                                      | gi 14389309 (+6)   | 7.88  | 10.95 | 12.36 | 1.6  | 1.4  | 1.1  |
| TUBB     | Tubulin beta chain                                          | gi 18088719 (+3)   | 0     | 11.79 | 15.21 | >1.5 | >1.5 | 1.3  |
| UBC      | Polyubiquitin-C                                             | gi 2627129 (+29)   | 5.25  | 9.27  | 11.41 | 2.2  | 1.8  | 1.2  |
| VDAC1    | Voltage-dependent anion-selective channel protein 1         | gi 198443050 (+4)  | 1     | 1.68  | 3.8   | 3.8  | 1.7  | 2.3  |
| VDAC2    | Similar to Voltage-dependent anion-selective channel        | gi 113412878 (+12) | 1     | 3.37  | 0.95  | 1.0  | 3.4  | 0.3  |
| VIM      | Vimentin                                                    | gi 62414289        | 26.27 | 40.44 | 47.54 | 1.8  | 1.5  | 1.2  |
| YWHAB    | 14-3-3 protein beta/alpha                                   | gi 4507949 (+1)    | 1     | 9.27  | 10.46 | 10.5 | 9.3  | 1.1  |
| YWHAE    | 14-3-3 protein epsilon                                      | gi 114665591 (+2)  | 2.63  | 9.27  | 11.41 | 4.3  | 3.5  | 1.2  |
| YWHAG    | 14-3-3 protein gamma                                        | gi 193785841 (+4)  | 1     | 8.42  | 8.56  | 8.6  | 8.4  | 1.0  |
|          |                                                             | gi 4929993         | 57.79 | 27.8  | 1     | 0.0  | 0.5  | 0.0  |
|          |                                                             | gi 166007160       | 28.9  | 26.12 | 9.51  | 0.3  | 0.9  | 0.4  |
|          |                                                             | gi 1065111 (+11)   | 2.63  | 1.68  | 0.95  | 0.4  | 0.6  | 0.6  |
|          |                                                             | gi 21669601        | 5.25  | 9.27  | 1.9   | 0.4  | 1.8  | 0.2  |
|          |                                                             | gi 16554039        | 18.39 | 24.43 | 6.66  | 0.4  | 1.3  | 0.3  |
|          |                                                             | gi 229959 (+1)     | 77.49 | 34.54 | 28.53 | 0.4  | 0.4  | 0.8  |
|          |                                                             | gi 194376242       | 17.07 | 14.32 | 6.66  | 0.4  | 0.8  | 0.5  |
|          |                                                             | gi 14719797 (+4)   | 9.19  | 5.05  | 3.8   | 0.4  | 0.5  | 0.8  |
|          |                                                             | gi 218681905 (+1)  | 15.76 | 15.16 | 6.66  | 0.4  | 1.0  | 0.4  |

|                    |       |       |       |      |      |     |
|--------------------|-------|-------|-------|------|------|-----|
| gj 229601          | 26.27 | 30.33 | 11.41 | 0.4  | 1.2  | 0.4 |
| gj 119389654 (+17) | 1.31  | 0.84  | 1     | 0.8  | 0.6  | 1.2 |
| gj 119602344 (+7)  | 1.31  | 1     | 1     | 0.8  | 0.8  | 1.0 |
| gj 119613805 (+2)  | 1     | 0     | 0.95  | 1.0  |      |     |
| gj 1096067 (+5)    | 1     | 1.68  | 0.95  | 1.0  | 1.7  | 0.6 |
| gj 114647215 (+16) | 1     | 0.84  | 1     | 1.0  | 0.8  | 1.2 |
| gj 119573745 (+3)  | 1     | 1.68  | 1     | 1.0  | 1.7  | 0.6 |
| gj 119579121 (+5)  | 1     | 1.68  | 1     | 1.0  | 1.7  | 0.6 |
| gj 1065033 (+140)  | 1     | 0.84  | 1     | 1.0  | 0.8  | 1.2 |
| gj 13786847 (+2)   | 1.31  | 5.05  | 1.9   | 1.5  | 3.9  | 0.4 |
| gj 119607495 (+1)  | 1     | 2.53  | 1.9   | 1.9  | 2.5  | 0.8 |
| gj 119619436 (+1)  | 1     | 0.84  | 1.9   | 1.9  | 0.8  | 2.3 |
| gj 17471847 (+1)   | 1     | 1     | 1.9   | 1.9  | 1.0  | 1.9 |
| gj 119582155 (+5)  | 2.63  | 3.37  | 5.71  | 2.2  | 1.3  | 1.7 |
| gj 119569329 (+1)  | 2.63  | 4.21  | 5.71  | 2.2  | 1.6  | 1.4 |
| gj 119568094 (+5)  | 1.31  | 3.37  | 2.85  | 2.2  | 2.6  | 0.8 |
| gj 230867          | 3.94  | 5.05  | 11.41 | 2.9  | 1.3  | 2.3 |
| gj 13786849 (+3)   | 1.31  | 5.9   | 4.75  | 3.6  | 4.5  | 0.8 |
| gj 1065361 (+6)    | 1     | 2.53  | 3.8   | 3.8  | 2.5  | 1.5 |
| gj 119601423 (+7)  | 1.31  | 3.37  | 5.71  | 4.4  | 2.6  | 1.7 |
| gj 161172138 (+5)  | 2.63  | 14.32 | 13.31 | 5.1  | 5.4  | 0.9 |
| gj 119597983 (+10) | 0     | 1.68  | 2.85  | >1.5 | >1.5 | 1.7 |
| gj 11276938 (+4)   | 0     | 2.53  | 0.95  |      | >1.5 | 0.4 |
